# Supplementary material for: Benderamide A, a Cyclic Depsipeptide from a Singapore Collection of Marine Cyanobacterium cf. Lyngbya sp
Source: MDPI journal article supplement (doi:10.3390/md16110409), 2018-10-26
Supplement: s1 [file s1]

**Benderamide A, a Cyclic Depsipeptide from a Singapore Collection of Marine Cyanobacterium  
*Lyngbya* sp.**

Chi Ying Gary Ding<sup>1</sup>, Ji Fa Marshall Ong<sup>1</sup>, Hui Chin Goh<sup>2</sup>, Cynthia R. Coffill<sup>2</sup>, Lik Tong Tan<sup>1,\*</sup>

<sup>1</sup> Natural Sciences and Science Education, National Institute of Education, Nanyang Technological University, 1 Nanyang Walk, Singapore 637616, Singapore

<sup>2</sup> p53 Laboratory, Agency for Science, Technology and Research (A\*STAR), #06-06, Immunos, 8A Biomedical Grove, Singapore 138648, Singapore

**SUPPLEMENTARY DATA**

| <b><u>Figures</u></b> |                                                                                                                            | <b><u>Page</u></b> |
|-----------------------|----------------------------------------------------------------------------------------------------------------------------|--------------------|
| Figure S1.            | Morphology of TLT/SJI/001 under microscope                                                                                 | 2                  |
| Figure S2.            | Flow chart of isolation and purification of benderamide A ( <b>1</b> )                                                     | 3                  |
| Figure S3.            | <sup>1</sup> H spectrum of benderamide A ( <b>1</b> ) recorded in CDCl <sub>3</sub> at 400 MHz                             | 4                  |
| Figure S4.            | <sup>13</sup> C spectrum of benderamide A ( <b>1</b> ) recorded in CDCl <sub>3</sub> at 400 MHz                            | 5                  |
| Figure S5.            | COSY spectrum of benderamide A ( <b>1</b> ) recorded in CDCl <sub>3</sub> at 400 MHz                                       | 6                  |
| Figure S6.            | HSQC spectrum of benderamide A ( <b>1</b> ) recorded in CDCl <sub>3</sub> at 400 MHz                                       | 7                  |
| Figure S7.            | HMBC spectrum of benderamide A ( <b>1</b> ) recorded in CDCl <sub>3</sub> at 400 MHz                                       | 8                  |
| Figure S8.            | NOESY spectrum of benderamide A ( <b>1</b> ) recorded in CDCl <sub>3</sub> at 600 MHz                                      | 9                  |
| Figure S9.            | 1D selective NOE (irradiation at 5.20 ppm) spectrum of benderamide A ( <b>1</b> ) recorded in CDCl <sub>3</sub> at 600 MHz | 10                 |
| Figure S10.           | Cellular proliferation, metabolism and caspase determination                                                               | 11                 |

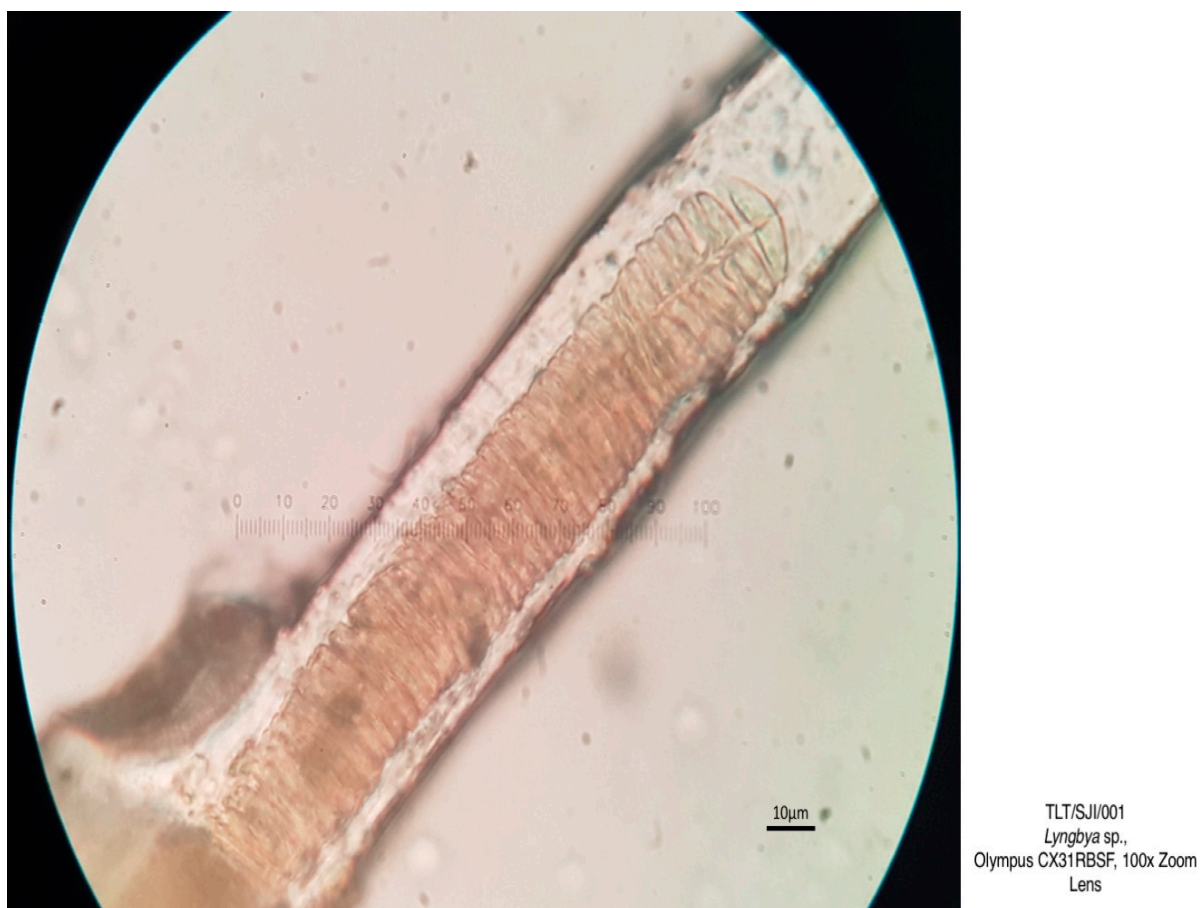

**Figure S1.** Morphology of TLT/SJI/001 under microscope (viewed under 100 × zoom lens)

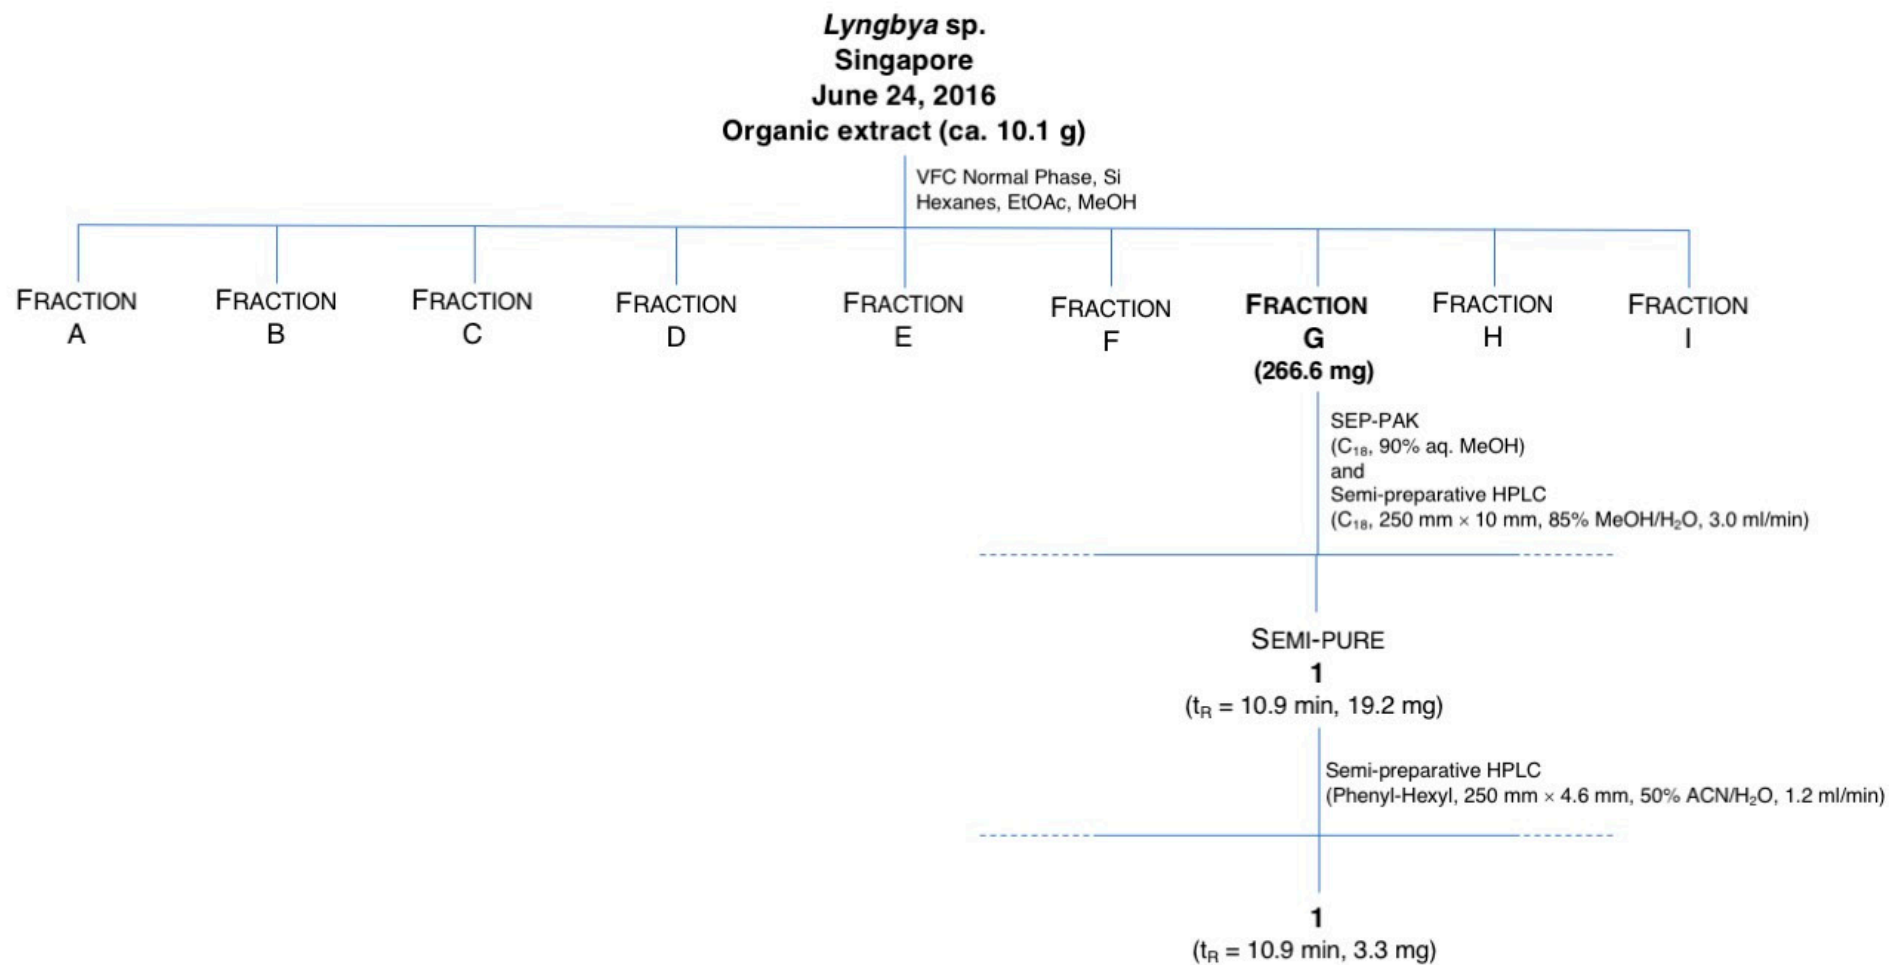

**Figure S2.** Flow chart of isolation and purification of benderamide A (**1**)

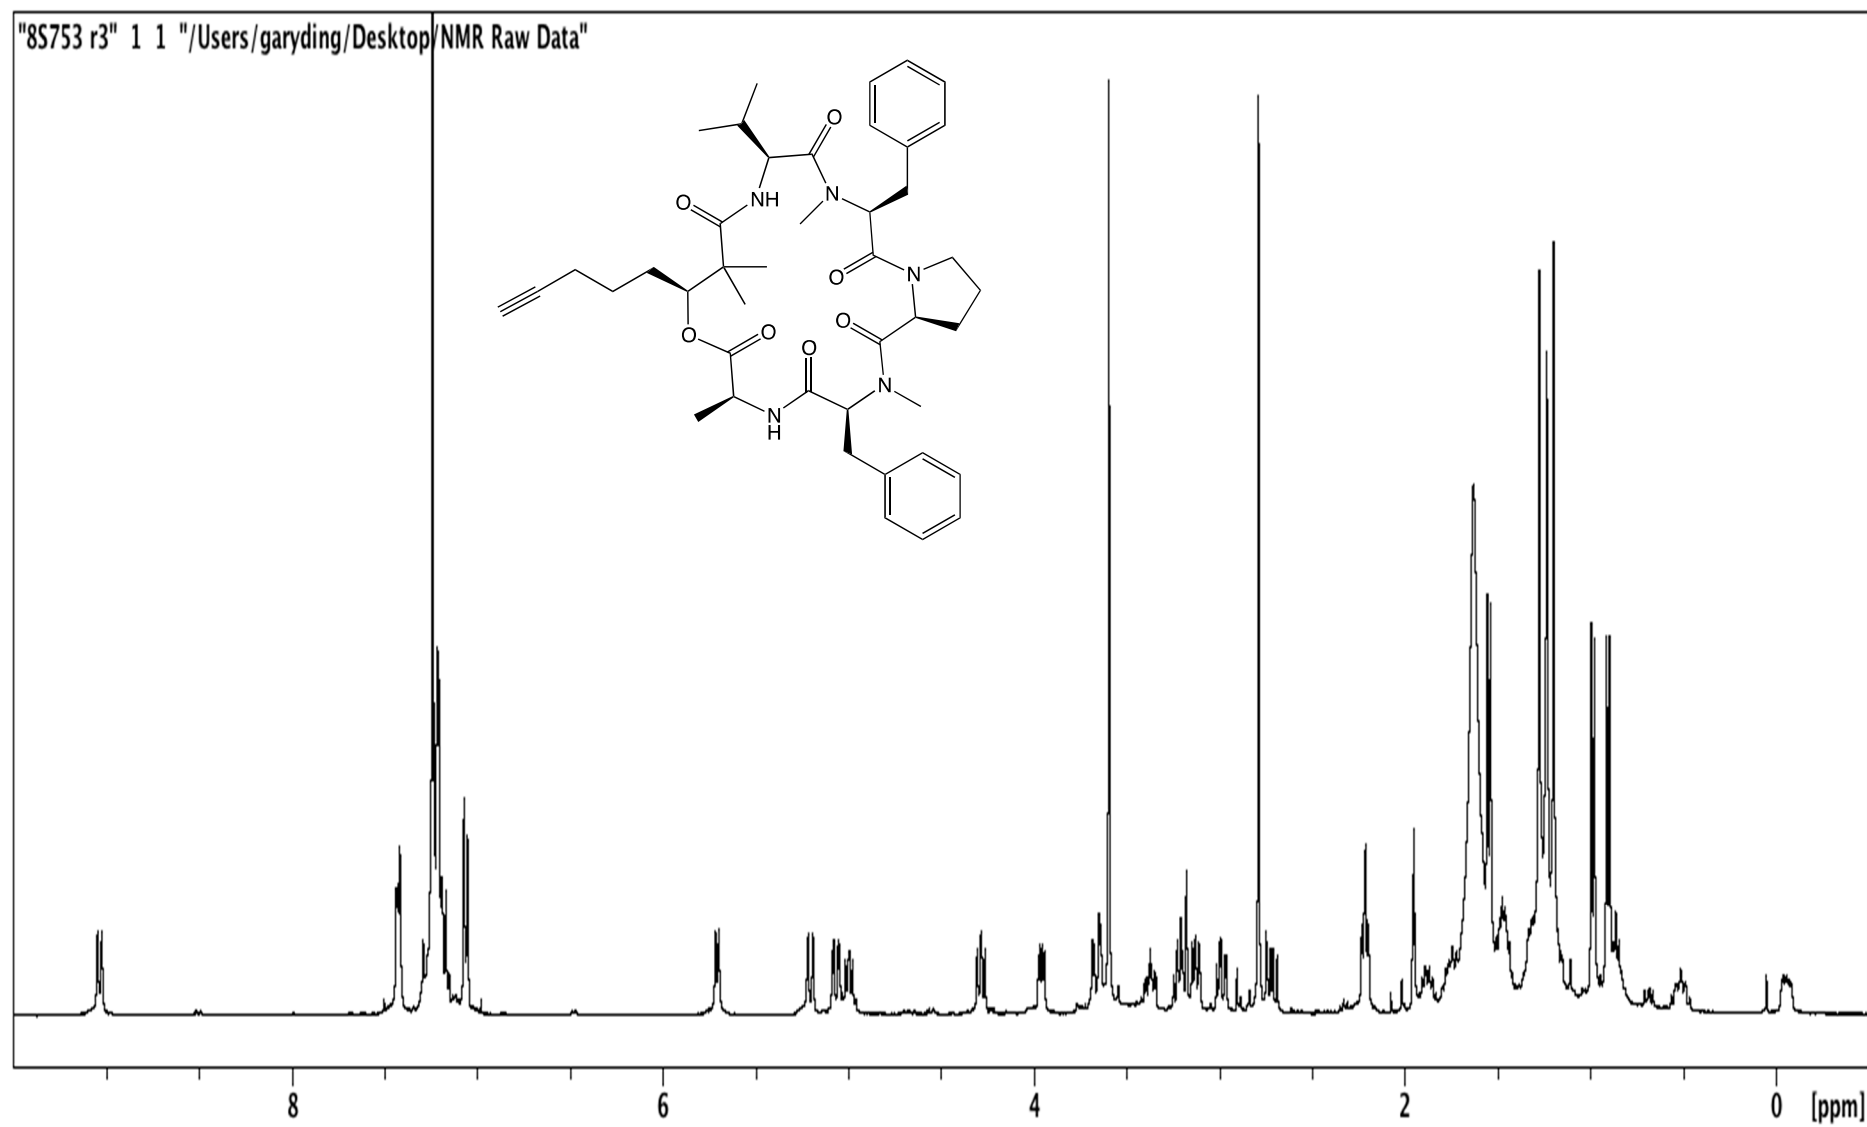

Figure S3.  $^1\text{H}$  spectrum of benderamide A (1) recorded in  $\text{CDCl}_3$  at 400 MHz

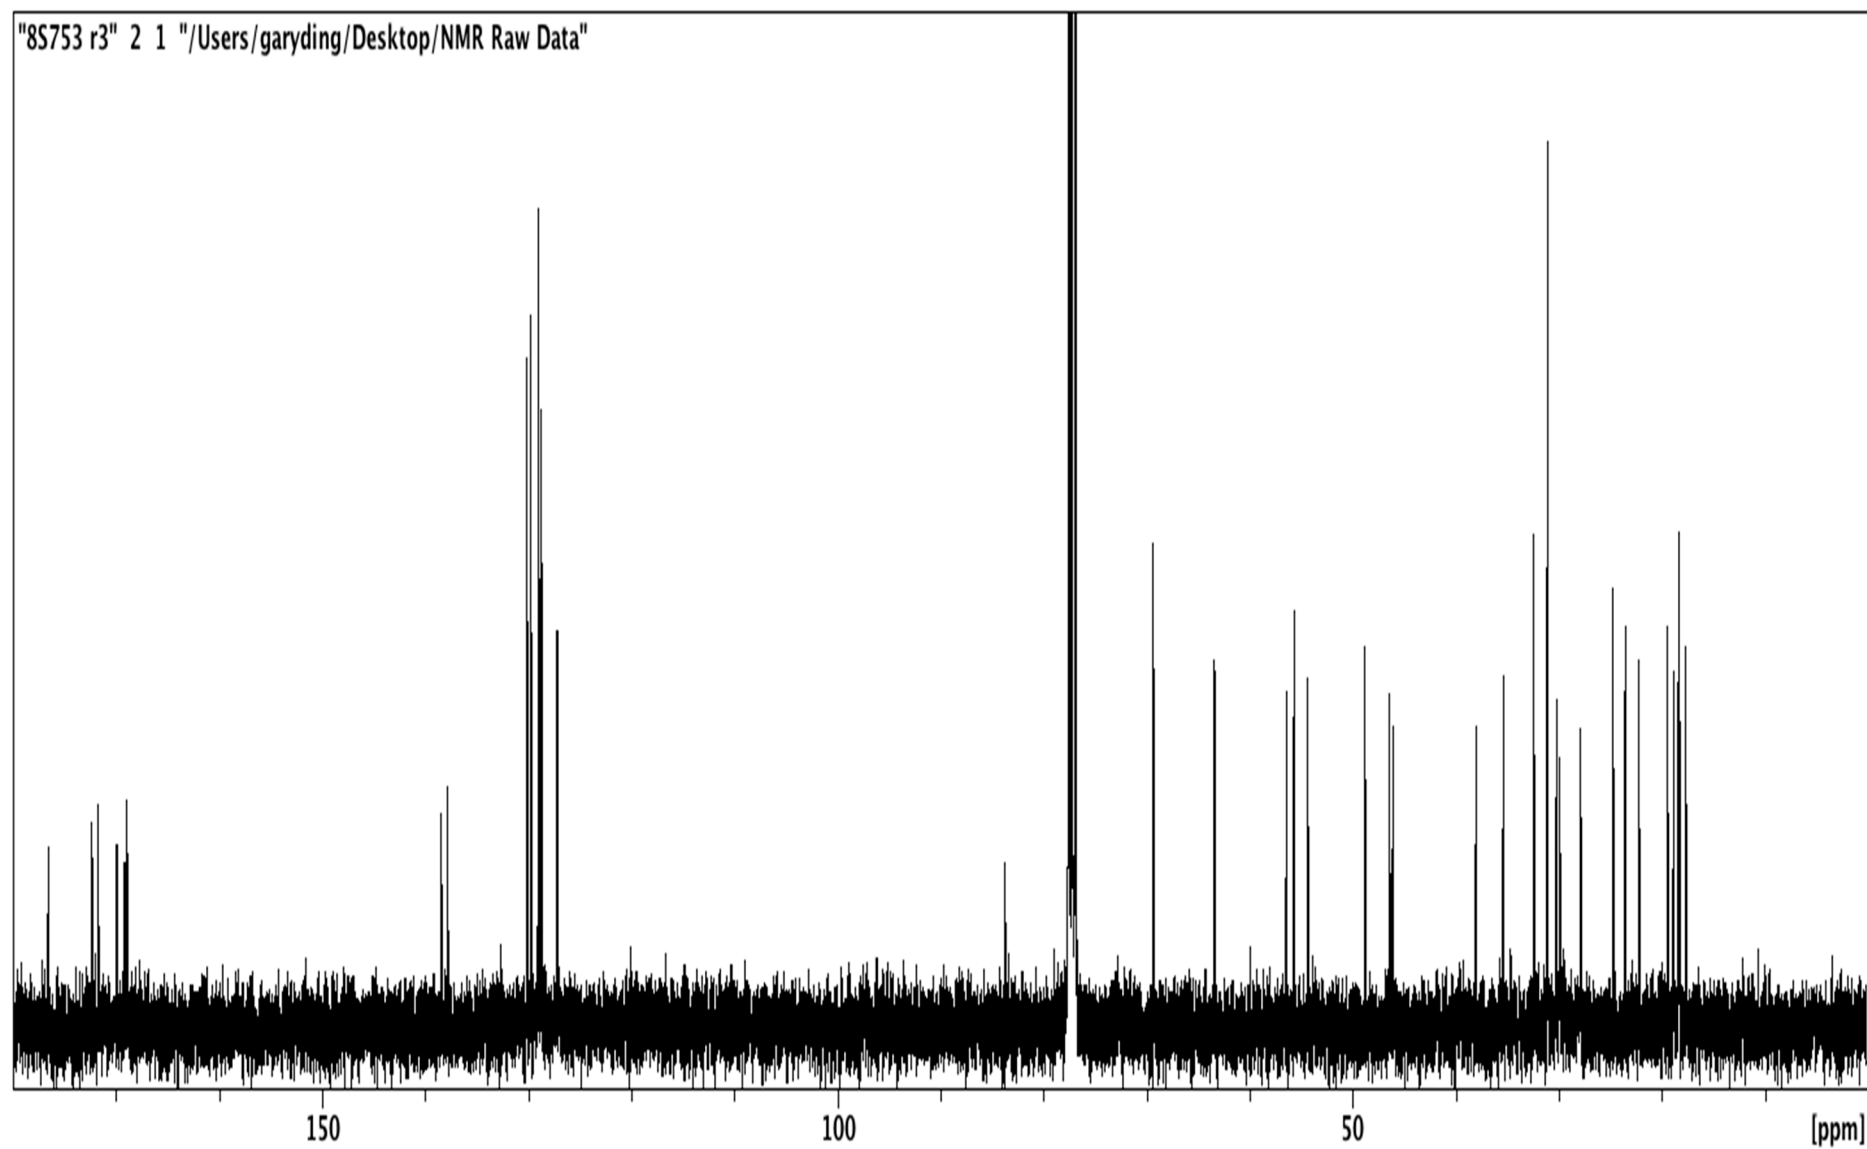

**Figure S4.**  $^{13}\text{C}$  spectrum of benderamide A (**1**) recorded in  $\text{CDCl}_3$  at 400 MHz



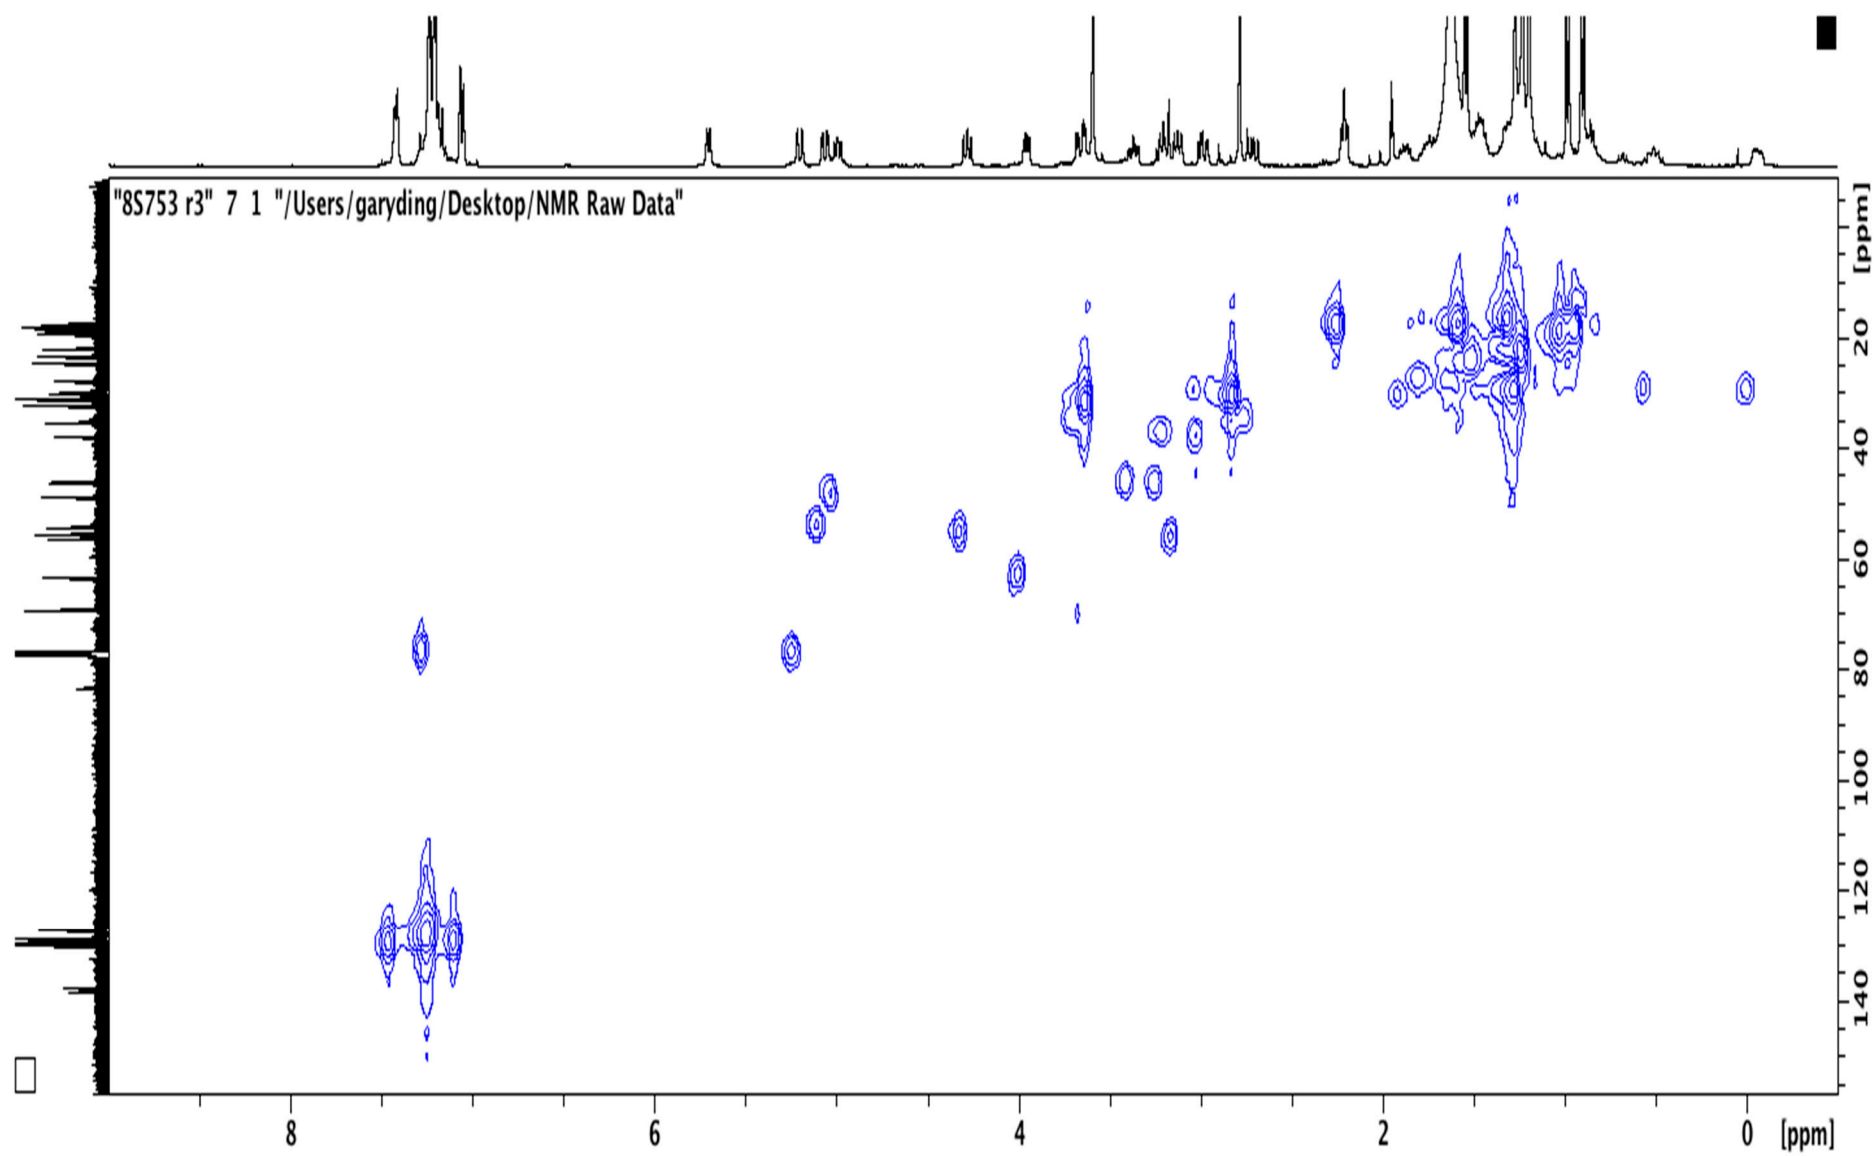

**Figure S6.** HSQC spectrum of benderamide A (**1**) recorded in CDCl<sub>3</sub> at 400 MHz

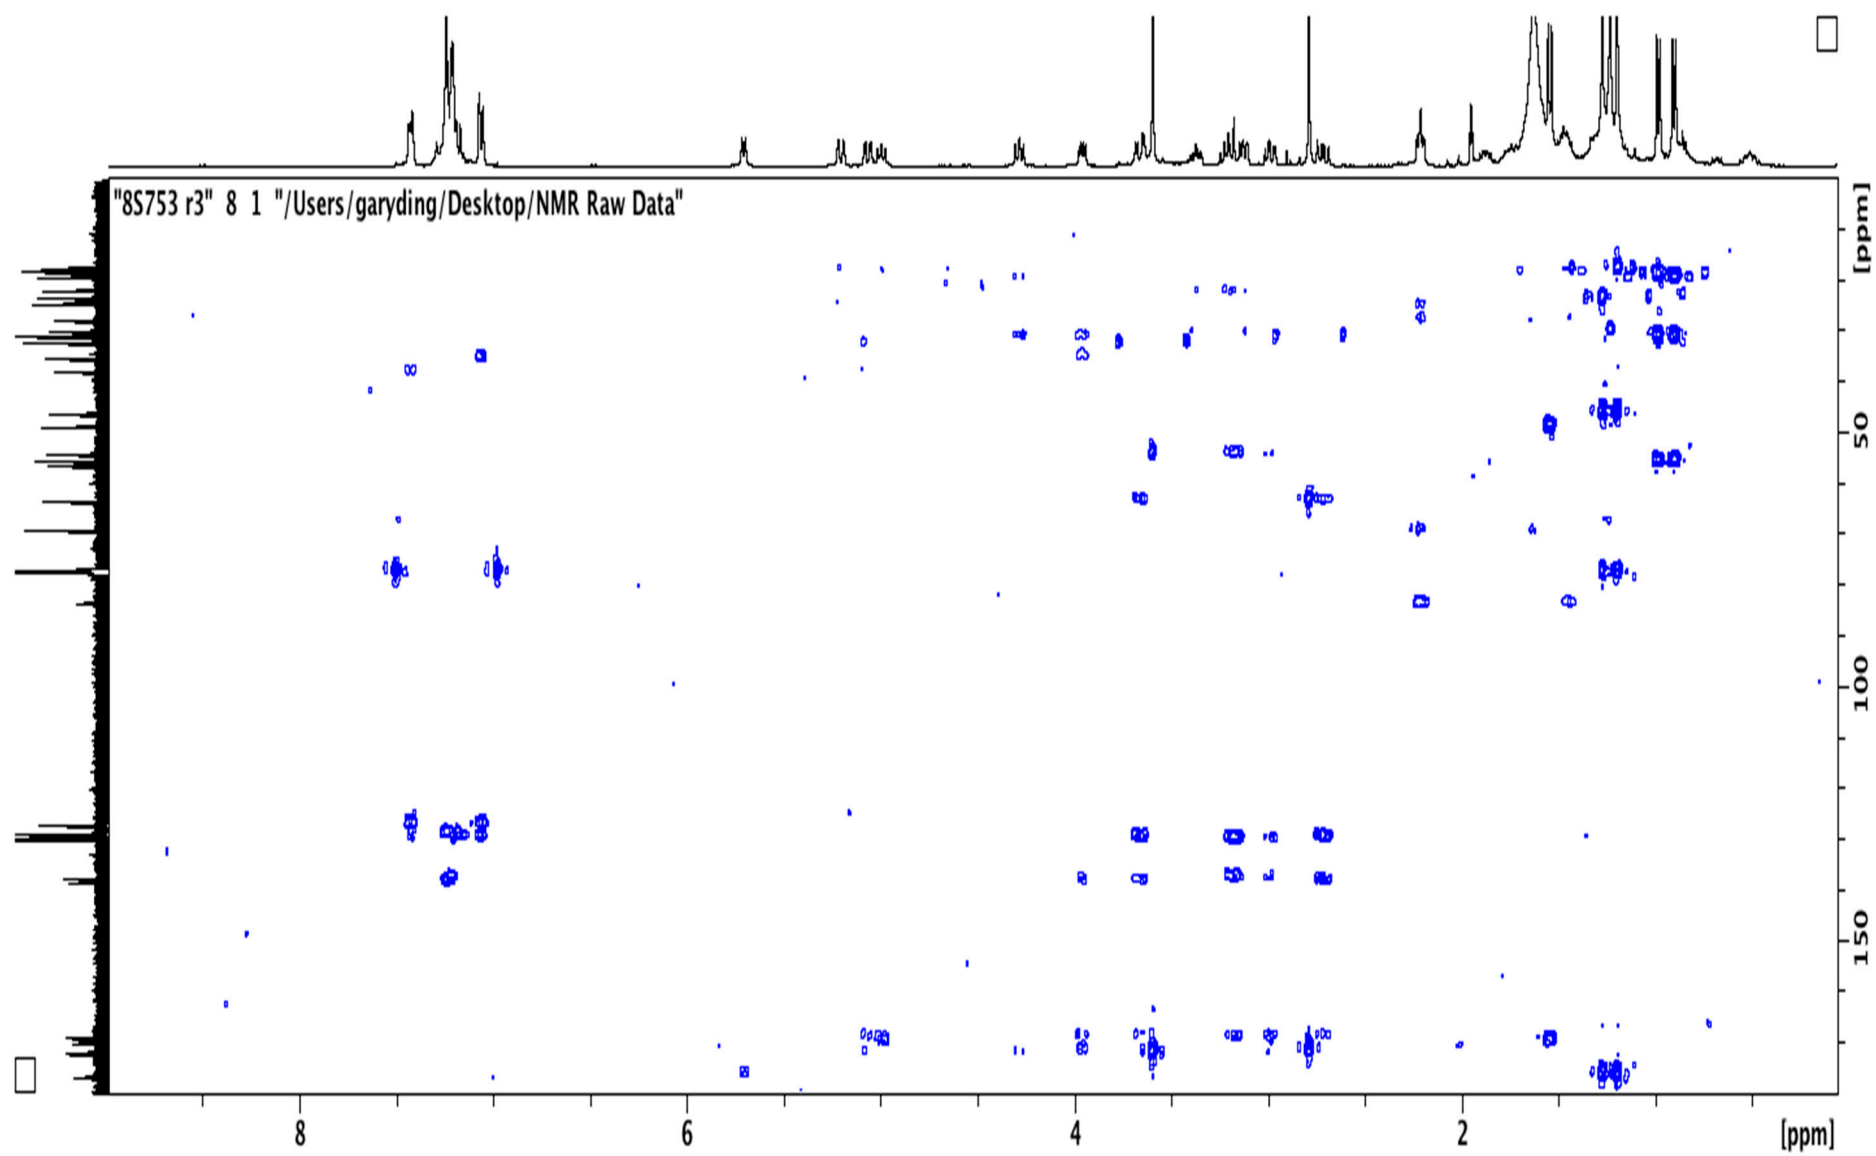

Figure S7. HMBC spectrum of benderamide A (1) recorded in CDCl<sub>3</sub> at 400 MHz



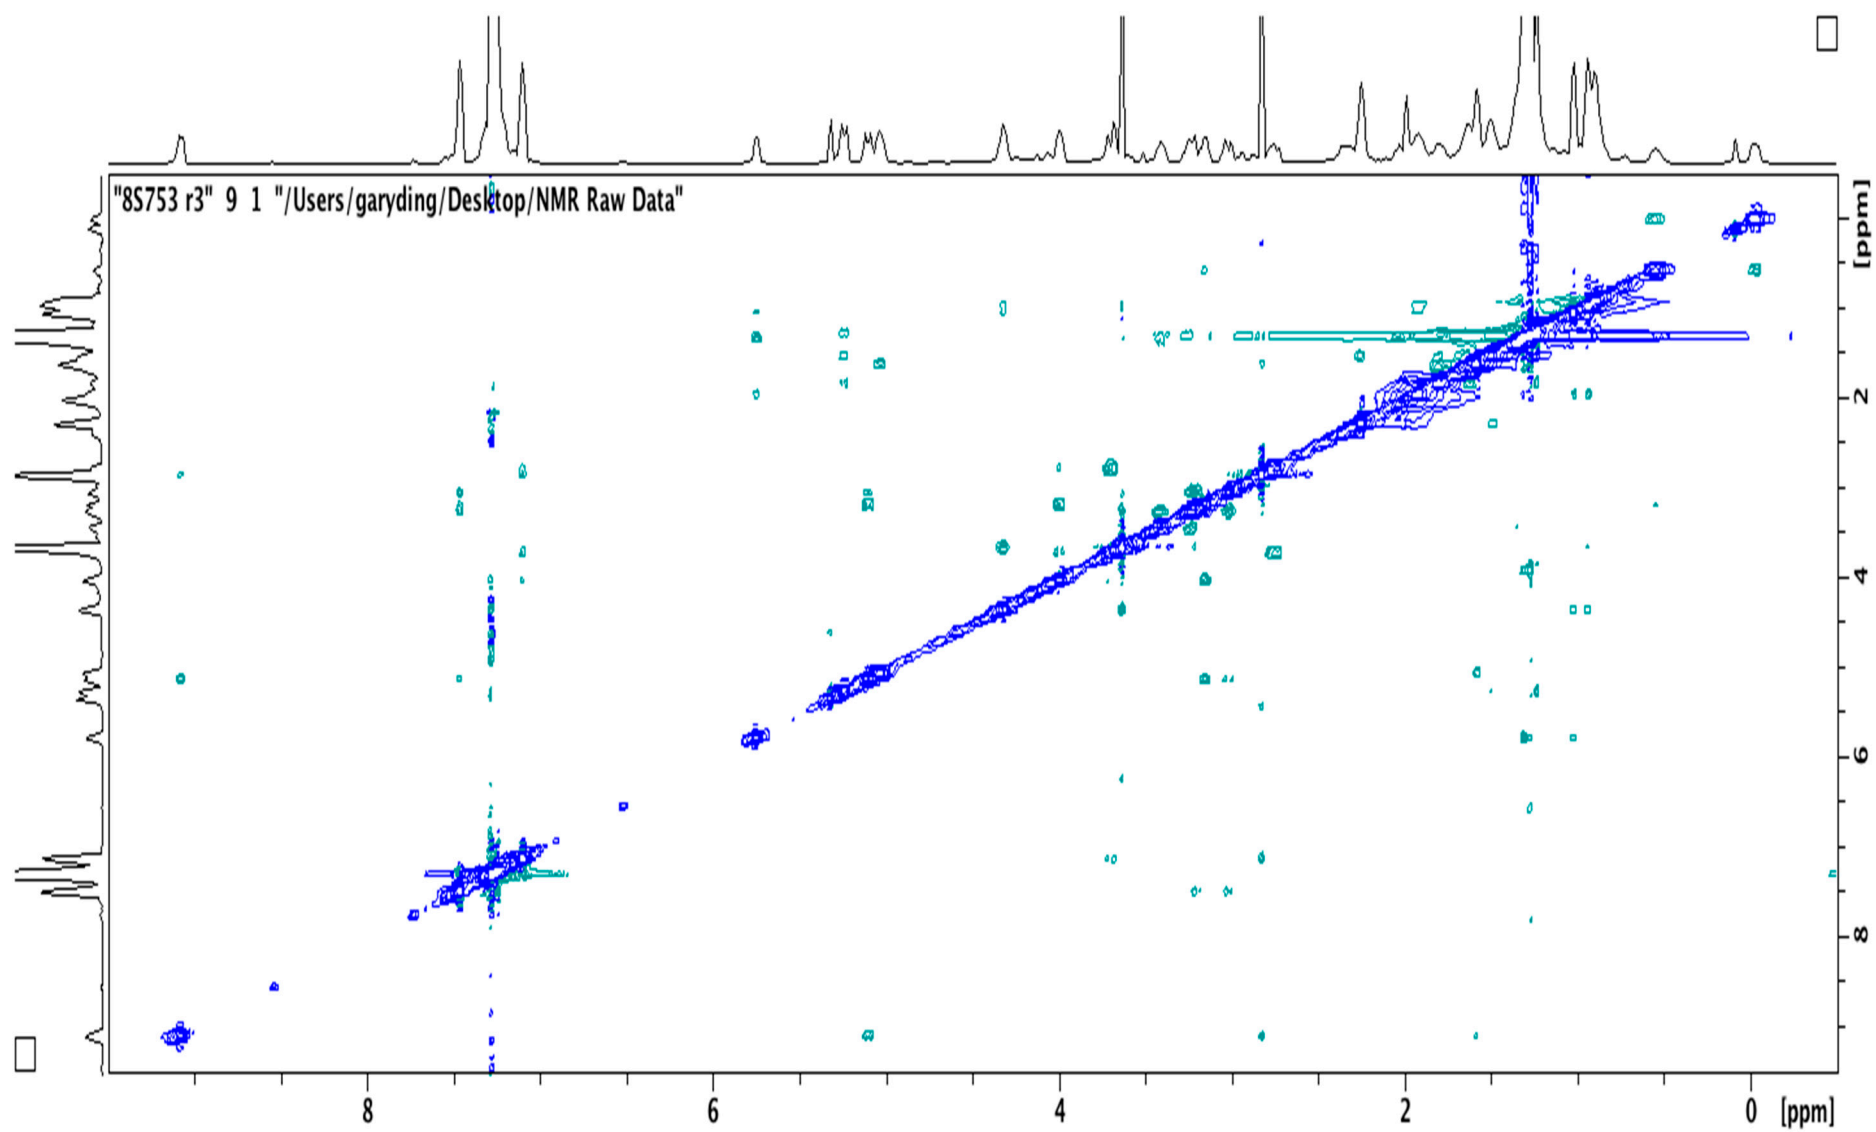

**Figure S8.** NOESY spectrum of benderamide A (**1**) recorded in CDCl<sub>3</sub> at 600 MHz

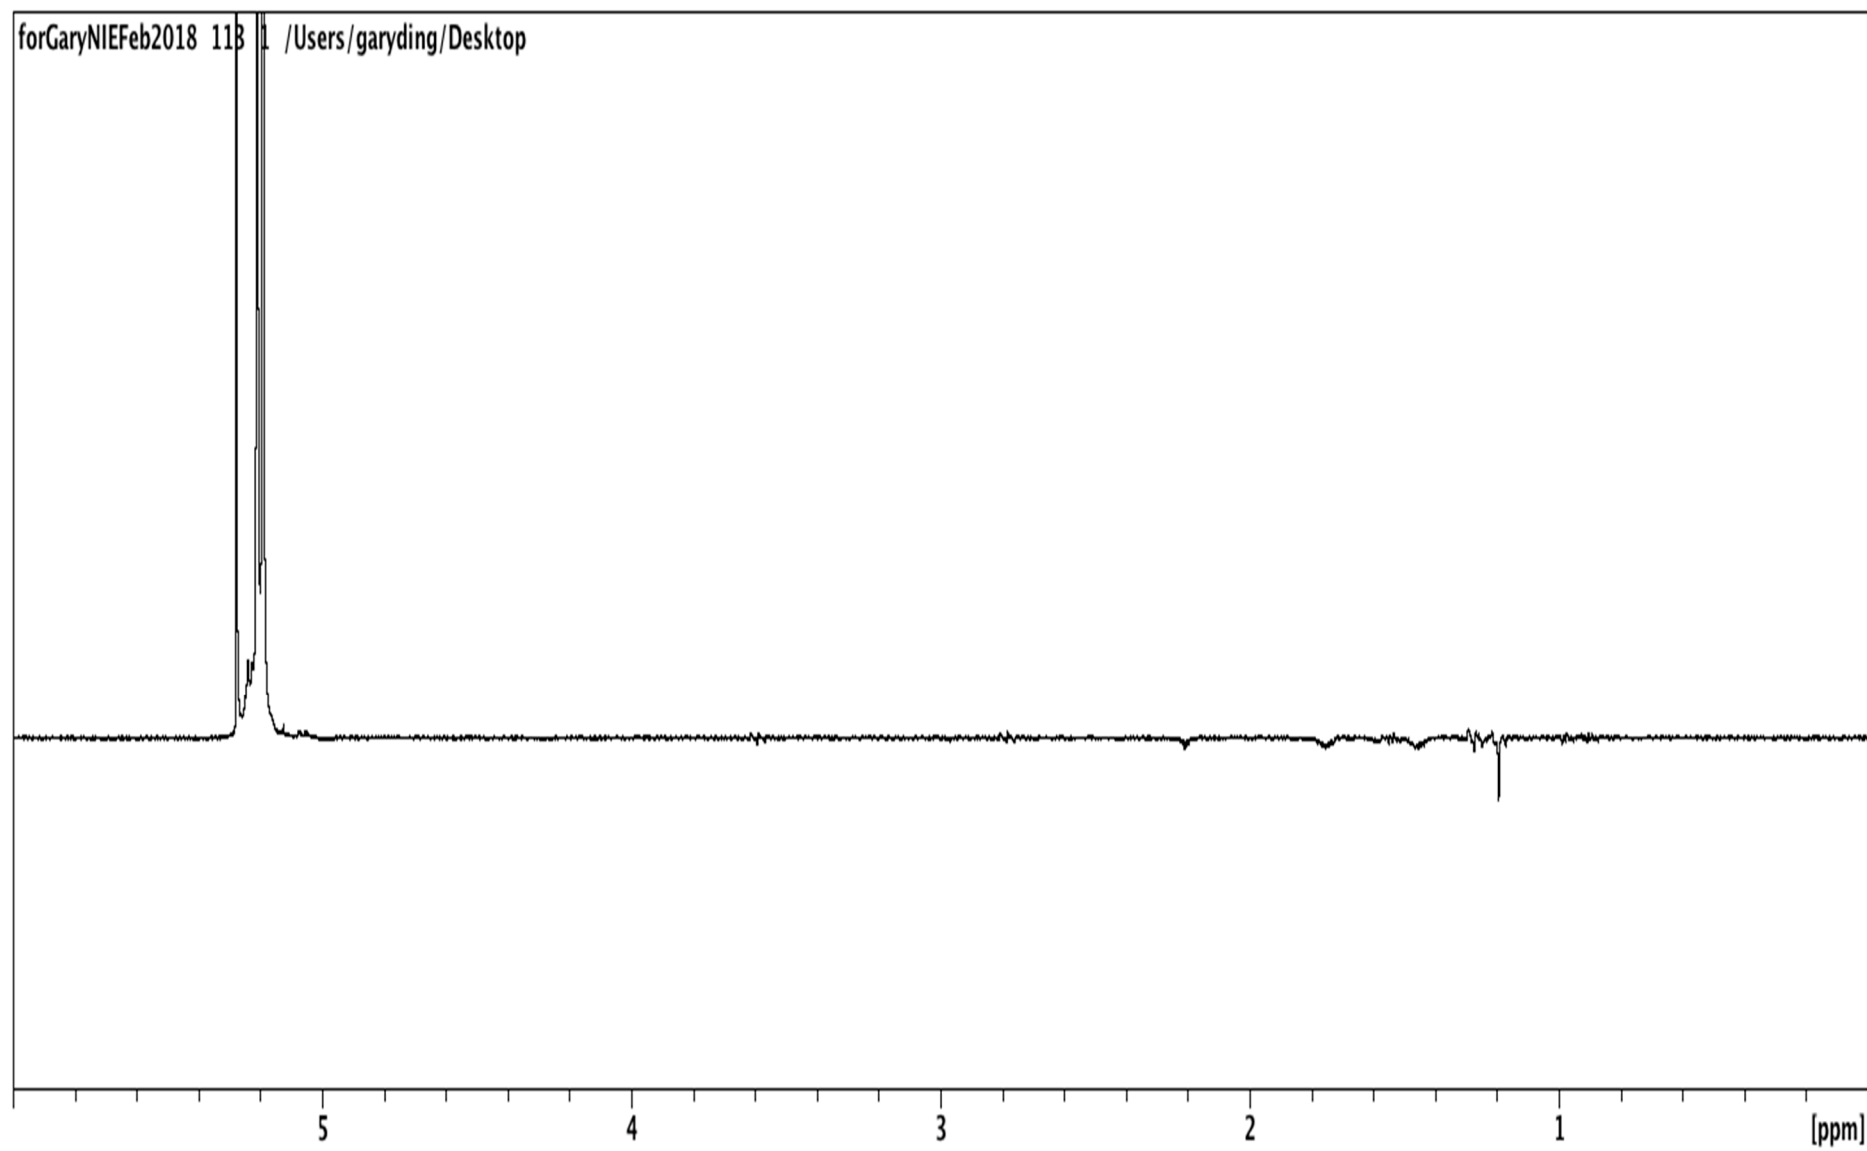

**Figure S9.** 1D selective NOE (irradiation at 5.20 ppm) spectrum of benderamide A (**1**) recorded in CDCl<sub>3</sub> at 600 MHz

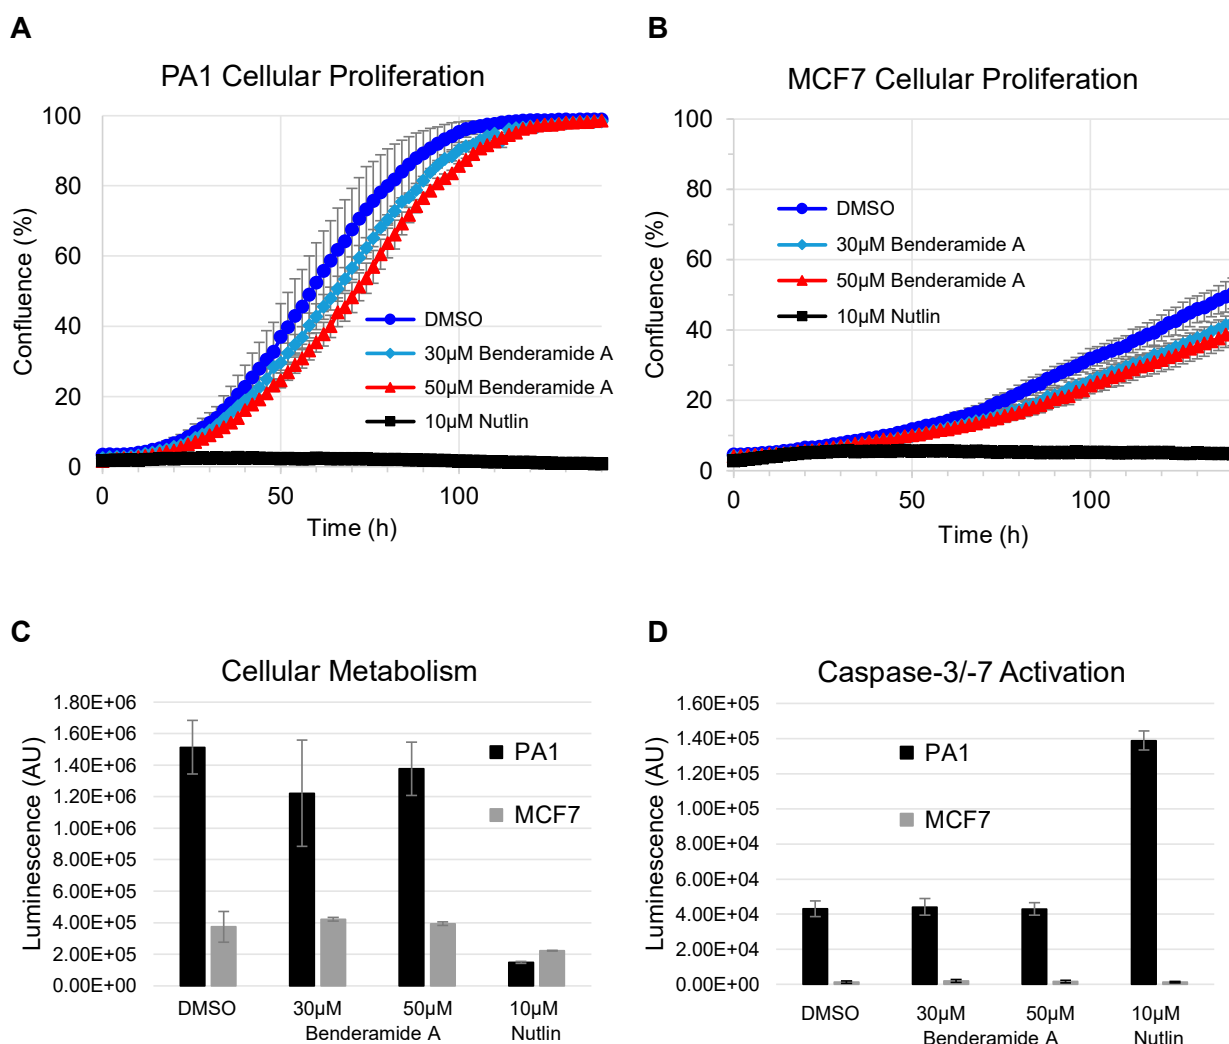

Proliferation as determined by percent confluence of human ovarian PAI (Panel A) or breast MCF7 (Panel B) cells was measured using IncuCyte for 140 h in the presence of DMSO (dark blue circles), 30  $\mu$ M Benderamide A (light blue diamonds), 50  $\mu$ M Benderamide A (red triangles) or 10  $\mu$ M Nutlin (black squares). Cell Titre Glo metabolism (viability) assay (Panel C) or Caspase-3/-7 (Panel D) was measured for both PA1 (black bars) or MCF7 (grey bars) 72 h following the indicated treatment. Each data point is the average over three wells for each condition and the data presented is representative of triplicate experiments. Error bars represent standard error.

**Figure S10.** Cellular proliferation, metabolism and caspase determination
